# Supplementary material
Source: PubMed Central journal article supplement (PMC4529060)
Supplement: NIHMS710918-supplement-eTable.pdf [file NIHMS710918-supplement-eTable.pdf]

## Supplementary Online Content

Leyenaar JK, Shieh MS, Lagu T, Pekow PS, Lindenauer PK. Variation and outcomes associated with direct admission among children with pneumonia in the United States. *JAMA Pediatr*. Published online July 2, 2014.  
doi:10.1001/jamapediatrics.2014.339.

**eTable.** Initial diagnostic testing and management of children admitted directly compared to those admitted through the emergency department, limited to those with hospitalizations of one day's duration

This supplementary material has been provided by the authors to give readers additional information about their work.

**eTable. Initial diagnostic testing and management of children admitted directly compared to those admitted through the emergency department, limited to those with hospitalizations of one day's duration.**

|                                                                              | Direct Admission<br>(n=1291, 27.2%) |        | ED admission<br>(n=3452, 72.8%) |        | p-value |
|------------------------------------------------------------------------------|-------------------------------------|--------|---------------------------------|--------|---------|
|                                                                              | n                                   | (%)    | n                               | (%)    |         |
| <b>Initial Investigations:</b>                                               |                                     |        |                                 |        |         |
| Complete blood count                                                         | 917                                 | (71.0) | 2931                            | (84.9) | <0.001  |
| Blood culture                                                                | 717                                 | (55.5) | 2661                            | (77.1) | <0.001  |
| Chest x-ray                                                                  | 791                                 | (61.3) | 3187                            | (92.3) | <0.001  |
| Chest CT                                                                     | 6                                   | (0.5)  | 20                              | (0.6)  | 0.63    |
| Chest ultrasound                                                             | 2                                   | (0.2)  | 2                               | (0.1)  | 0.31    |
| Arterial blood gas                                                           | 11                                  | (0.9)  | 76                              | (2.2)  | <0.01   |
| Acute phase reactants (ESR or CRP)                                           | 223                                 | (17.3) | 504                             | (14.6) | 0.02    |
| Urine culture                                                                | 94                                  | (7.3)  | 486                             | (14.1) | <0.001  |
| Cerebral spinal fluid culture                                                | 1                                   | (0.1)  | 13                              | (0.4)  | 0.09    |
| Test for viral pathogens                                                     | 358                                 | (27.7) | 1264                            | (36.6) | <0.001  |
| <b>Initial Therapies:</b>                                                    |                                     |        |                                 |        |         |
| IV or oral steroids                                                          | 332                                 | (25.7) | 1347                            | (39.0) | <0.001  |
| Short-acting beta-agonists                                                   | 683                                 | (52.9) | 2083                            | (60.3) | <0.001  |
| Chronic asthma medications                                                   | 183                                 | (14.2) | 516                             | (14.9) | 0.50    |
| <b>Initial antibiotics:</b>                                                  |                                     |        |                                 |        |         |
| Aminopenicillin or cephalosporin <sup>a</sup><br>(alone)                     | 676                                 | (52.4) | 1643                            | (47.6) | <0.01   |
| Macrolide (alone)                                                            | 132                                 | (10.2) | 256                             | (7.4)  | <0.01   |
| Aminopenicillin or cephalosporin <sup>a</sup> +<br>macrolide                 | 246                                 | (19.1) | 911                             | (26.4) | <0.001  |
| Aminopenicillin or cephalosporin <sup>a</sup> +<br>vancomycin or clindamycin | 18                                  | (1.4)  | 33                              | (1.0)  | 0.19    |
| Other                                                                        | 219                                 | (17.0) | 609                             | (17.6) | 0.58    |

<sup>a</sup> third generation cephalosporin (ceftriaxone or cefotaxime)
